# Supplementary material for: Genome Characterization and Spaciotemporal Dispersal Analysis of Bagaza Virus Detected in Portugal, 2021
Source: MDPI journal article supplement (doi:10.3390/pathogens12020150), 2023-01-17
Supplement: s1 [file s1]

## Supplementary materials

**Table S1.** Referenced viruses strains used in this study.

| No | Virus | GenBank N° | Year | Host                       | Location                    |
|----|-------|------------|------|----------------------------|-----------------------------|
| 1  | BAGV  | LC730845   | 2021 | Red-legged<br>partridge    | Portugal                    |
| 2  | BAGV  | HQ644144   | 2010 | Red-legged<br>partridge    | Spain                       |
| 3  | BAGV  | KR108245   | 2010 | Red-legged<br>partridge    | Spain                       |
| 4  | BAGV  | KR108246   | 2010 | Red-legged<br>partridge    | Spain                       |
| 5  | BAGV  | KR108244   | 2010 | Red-legged<br>partridge    | Spain                       |
| 6  | BAGV  | HQ644143   | 2010 | Red-legged<br>partridge    | Spain                       |
| 7  | BAGV  | LC318701   | 2013 | Culex<br>quinquefasciatus  | Zambia                      |
| 8  | BAGV  | MW672101   | 2018 | Culex univittatus          | Namibia                     |
| 9  | BAGV  | MF380429   | 1988 | Culex poicilipes           | Cote d'Ivoire               |
| 10 | BAGV  | MF380430   | 1989 | Culex poicilipes           | Senegal                     |
| 11 | BAGV  | MF380434   | 2014 | Culex neavei               | Senegal                     |
| 12 | BAGV  | MF380433   | 2001 | Culex poicilipes           | Senegal                     |
| 13 | BAGV  | MF380428   | 2004 | Culex poicilipes           | Senegal                     |
| 14 | BAGV  | MF380426   | 2000 | Culex poicilipes           | Senegal                     |
| 15 | BAGV  | MF380432   | 2001 | Culex poicilipes           | Senegal                     |
| 16 | BAGV  | MF380431   | 1994 | Culex neavei               | Senegal                     |
| 17 | BAGV  | MF380427   | 2004 | Culex poicilipes           | Senegal                     |
| 18 | BAGV  | MF380425   | 2000 | Culex poicilipes           | Senegal                     |
| 19 | BAGV  | MF380424   | 1989 | Culex poicilipes           | Senegal                     |
| 20 | BAGV  | NC012534   | NA   | Mosquito                   | Central African<br>Republic |
| 21 | BAGV  | EU684972   | 1996 | Culex<br>tritaeniorhynchus | India                       |

|    |       |          |      |                            |          |
|----|-------|----------|------|----------------------------|----------|
| 22 | ITMV  | KC734552 | 2010 | Turkey                     | Israel   |
| 23 | ITMV  | KC734550 | 1995 | Turkey                     | Israel   |
| 24 | ITMV  | KC734549 | 1985 | Turkey                     | Israel   |
| 25 | ITMV  | KF917537 | 1959 | Turkey                     | Israel   |
| 26 | TMUV  | JX477685 | 1955 | NA                         | Malaysia |
| 27 | TMUV* | JX477686 | 2000 | NA                         | Malaysia |
| 28 | TMUV  | MW821486 | 2020 | Goose                      | Taiwan   |
| 29 | TMUV  | MW922032 | 2019 | Mallard                    | Taiwan   |
| 30 | TMUV  | MH748542 | 2014 | Mallard                    | China    |
| 31 | TMUV  | KT607936 | 2012 | Culex<br>tritaeniorhynchus | China    |
| 32 | TMUV  | KT607935 | 2012 | Culex<br>tritaeniorhynchus | China    |
| 33 | TMUV  | KX097990 | 2012 | Pekin duck                 | Malaysia |
| 34 | TMUV  | MF621927 | 2007 | Duck                       | Thailand |
| 35 | TMUV  | KR061333 | 2013 | Duck                       | Thailand |
| 36 | TMUV  | MH460536 | 2015 | Mosquito                   | Thailand |
| 37 | TMUV  | MT708901 | 2019 | Goose                      | China    |
| 38 | TMUV  | MN966679 | 2019 | Duck                       | China    |
| 39 | TMUV  | MT951413 | 2020 | Goose                      | China    |
| 40 | TMUV  | MT951412 | 2020 | Duck                       | China    |
| 41 | TMUV  | KY623436 | 2015 | Duck                       | China    |
| 42 | TMUV  | KX686579 | 2015 | layer duck                 | China    |
| 43 | TMUV  | KM275941 | 2013 | Duckling                   | China    |
| 44 | TMUV  | KJ782380 | 2012 | Chicken                    | China    |
| 45 | TMUV* | JF926699 | 2010 | Layer duck                 | China    |
| 46 | TMUV  | KP096415 | 2014 | Duck                       | China    |
| 47 | TMUV  | MT447092 | 2018 | Duck                       | China    |
| 48 | TMUV  | KF826767 | 2012 | House Sparrow              | China    |
| 49 | TMUV  | MZ574097 | 2019 | Duck                       | China    |
| 50 | TMUV  | KY810818 | 2015 | Duck                       | China    |
| 51 | TMUV  | KX452096 | 2014 | Duck                       | China    |
| 52 | TMUV  | KJ740745 | 2013 | Layer Duck                 | China    |

|    |                                     |          |      |                                |              |
|----|-------------------------------------|----------|------|--------------------------------|--------------|
| 53 | TMUV                                | MH764607 | 2017 | Meat Ducks                     | China        |
| 54 | TMUV                                | MH764606 | 2016 | Meat Ducks                     | China        |
| 55 | TMUV                                | JQ289550 | 2010 | Duck                           | China        |
| 56 | TMUV*                               | JQ920425 | 2010 | Pigeon                         | China        |
| 57 | TMUV                                | MN649267 | 2014 | Duck                           | China        |
| 58 | TMUV                                | KC990540 | 2010 | Duck                           | China        |
| 59 | TMUV                                | KC990541 | 2012 | Duck                           | China        |
| 60 | NTAV                                | KF917539 | 1943 | Mosquito                       | Uganda       |
| 61 | NTAV                                | NC018705 | 1966 | NA                             | Cameroon     |
| 62 | Rocio                               | NC040776 | NA   | NA                             | NA           |
| 63 | ILHV                                | MH932545 | 1994 | Anopheles<br>triannulatus      | Brazil       |
| 64 | ILHV                                | NC009028 | NA   | NA                             | NA           |
| 65 | ILHV                                | KC481679 | 2010 | Aedes scapularis               | Brazil       |
| 66 | Entebbe bat                         | KP233893 | 2011 | Little free-tailed bat         | Uganda       |
| 67 | Sokoluk                             | KF917541 | 1970 | Pipistrellus                   | Kyrgyzstan   |
| 68 | Yokose                              | MH051229 | 2013 | Daubenton's bat                | China        |
| 69 | Montana myotis<br>leukoencephalitis | AJ299445 | NA   | NA                             | USA          |
| 70 | Rio Bravo                           | AF144692 | NA   | NA                             | USA          |
| 71 | Jutiaba                             | KJ469371 | 1969 | Hispid cotton rat              | Guatemala    |
| 72 | Modoc                               | AJ242982 | NA   | NA                             | USA          |
| 73 | Cell fusing agent                   | NC001564 | 2012 | Aedes aegypti                  | USA          |
| 74 | Aedes flavivirus                    | AB488408 | 2003 | Aedes albopictus               | Japan        |
| 75 | Palm Creek                          | KC505248 | 2010 | Coquillettidia<br>xanthogaster | Australia    |
| 76 | Culex flavivirus                    | GQ165808 | 2008 | Culex<br>quinquefasciatus      | Uganda       |
| 77 | Culex theileri<br>flavivirus        | HE574573 | 2011 | Culex theileri                 | Portugal     |
| 78 | Tyuleniy                            | KT224356 | 1986 | Seabird Tick                   | Russia       |
| 79 | Karshi                              | DQ462443 | 1978 | Ornithodoros tick              | Turkmenistan |
| 80 | Royal Farm                          | NC039219 | NA   | NA                             | Afghanistan  |

|     |                         |          |      |                     |                          |
|-----|-------------------------|----------|------|---------------------|--------------------------|
| 81  | Meaban                  | DQ235144 | NA   | NA                  | France                   |
| 82  | Langat                  | MK680893 | 1973 | Haemaphysalis tick  | Thailand                 |
| 83  | Powassan                | MZ576219 | 2020 | Hard-bodied tick    | USA                      |
| 84  | Alkhumra                | NC004355 | 1995 | Human               | Saudi Arabia             |
| 85  | Tick borne encephalitis | JN003208 | 2002 | Human               | Russia                   |
| 86  | Louping ill             | MN844186 | 1991 | Sheep               | UK                       |
| 87  | Bouboui                 | DQ859057 | NA   | NA                  | Central African Republic |
| 88  | Banzi                   | DQ859056 | NA   | NA                  | South Africa             |
| 89  | Potiskum                | DQ859067 | NA   | NA                  | Papua New Guinea         |
| 90  | Wesselsbron             | JN226796 | 1997 | Human               | South Africa             |
| 91  | Yellow Fever            | MF370533 | 2017 | Human               | Brazil                   |
| 92  | Lammi                   | FJ606789 | 2004 | Mosquito            | Finland                  |
| 93  | Chaoyang                | FJ883471 | 2008 | Mosquito            | China                    |
| 94  | Ilomantsi               | KC692067 | 2007 | Mosquito            | Finland                  |
| 95  | Donggang                | NC016997 | 2009 | Aedes sp.           | China                    |
| 96  | Zika                    | KX893855 | 2016 | Human               | Venezuela                |
| 97  | Dengue                  | AY618991 | 1977 | NA                  | Thailand                 |
| 98  | Dengue                  | EU056812 | 1977 | Human               | Puerto Rico              |
| 99  | Dengue                  | EF105385 | 1974 | Aedes luteocephalus | Senegal                  |
| 100 | Dengue                  | AY099336 | 2000 | NA                  | Sri Lanka                |
| 101 | Dengue                  | EU482822 | 2006 | Human               | Vietnam                  |
| 102 | Iguape                  | MK332105 | 1994 | Anopheles cruzii    | Brazil                   |
| 103 | Usutu                   | AY453411 | 2001 | Bird                | Austria                  |
| 104 | Japanese encephalitis   | LC705012 | 2012 | Cattle              | Japan                    |
| 105 | Koutango                | MN057643 | 2016 | Sandfly             | Niger                    |
| 106 | Kunjin                  | KX394405 | 1963 | Culex annulirostris | Australia                |
| 107 | WNV                     | DQ786572 | 2004 | House Sparrow       | France                   |
| 108 | Baiyangdian             | JF312912 | 2010 | Duck                | China                    |

\*Sitiawan virus, Baiyangdian virus and Duck egg-drop syndrome virus (DEDSV) are currently considered to be subtypes of TMUV.
