# Supplementary figures and images for: Genome Characterization and Spaciotemporal Dispersal Analysis of Bagaza Virus Detected in Portugal, 2021
Source: MDPI journal article supplement (doi:10.3390/pathogens12020150), 2023-01-17

A

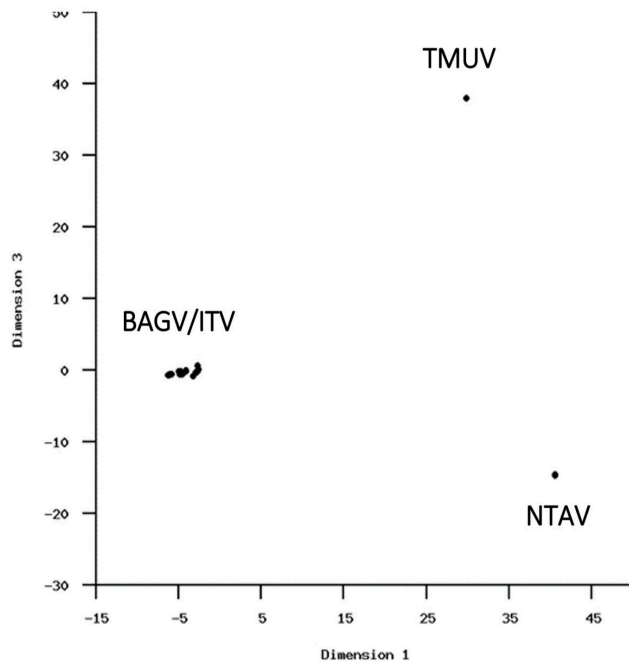

B

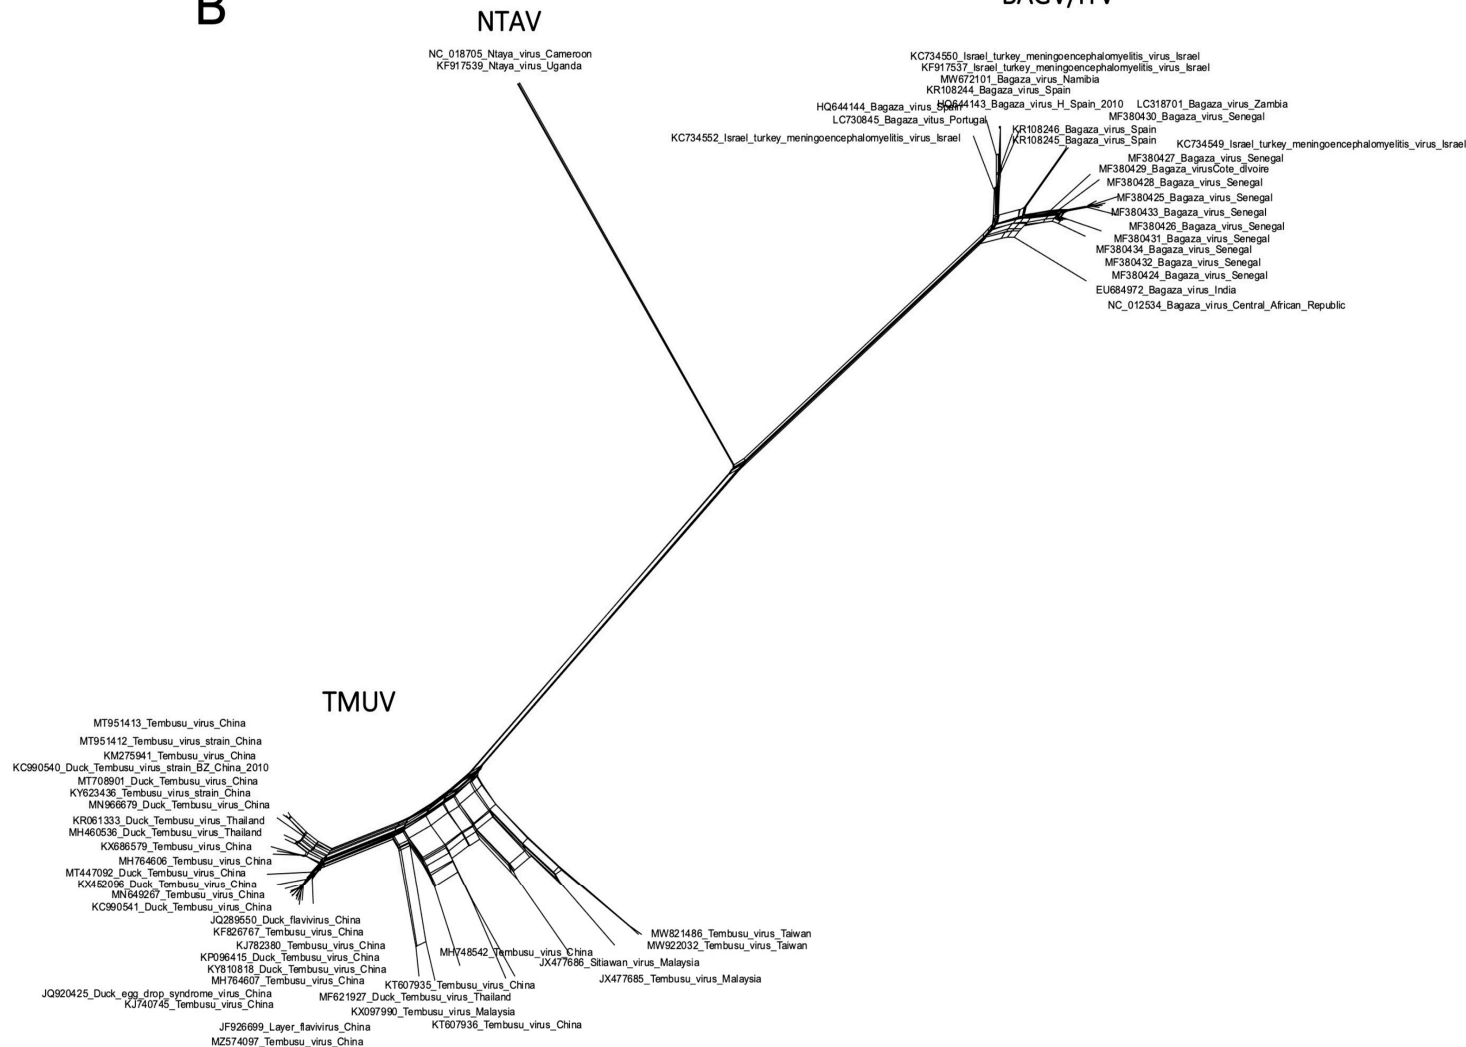

Supplement: s1 [file s1]
